# Supplementary material for: Expanded Polystyrene Beads Coated with Intumescent Flame Retardant Material to Achieve Fire Safety Standards
Source: MDPI journal article supplement (doi:10.3390/polym13162662), 2021-08-10
Supplement: s1 [file s1]

Article

# Expanded Polystyrene Beads Coated with Intumescent Flame Retardant Material to Achieve Fire Safety Standards

Sangram P. Bhoite <sup>1,†</sup>, Jonghyuck Kim <sup>2,†</sup>, Wan Jo <sup>2</sup>, Pravin H. Bhoite <sup>3</sup>, Sawanta S. Mali <sup>1</sup>, Kyu-Hwan Park <sup>2,\*</sup> and Chang Kook Hong <sup>1,\*</sup>

<sup>1</sup> School of Chemical Engineering, Chonnam National University, Gwangju 61186, Korea; sangrambhoite07@gmail.com (S.P.B.); sawantasolar@gmail.com (S.S.M.)

<sup>2</sup> HDC HYUNDAI EP R & D Center, Yongin-si, Gyeonggi-do 463811, Korea; kimjh1740@hdc-hyundaiep.com (J.K.); jowan@hdc-hyundaiep.com (W.J.)

<sup>3</sup> Department of Chemistry, Kisan Veer Mahavidyalaya, Wai 412803, MS, India; bhoiteph@gmail.com

\* Correspondence: kyu@hdc-hyundaiep.com (K.-H.P.); hongck@jnu.ac.kr (C.K.H.)

† These authors contributed equally to this work.

**Citation:** Bhoite, S.P.; Kim, J.; Jo, W.; Bhoite, P.H.; Mali, S.S.; Park, K.-H.; Hong, C.K. Expanded Polystyrene Beads Coated with Intumescent Flame Retardant Material to Achieve Fire Safety Standards. *Polymers* **2021**, *1*, 6266. <https://doi.org/10.3390/polym1316266>

Academic Editor: Vinayak G Parale, Hyung-Ho Park and Varsha D. Phadtare

Received: 21 May 2021

Accepted: 6 August 2021

Published: 10 August 2021

**Publisher's Note:** MDPI stays neutral with regard to jurisdictional claims in published maps and institutional affiliations.

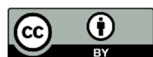

**Copyright:** © 2021 by the authors. Licensee MDPI, Basel, Switzerland. This article is an open access article distributed under the terms and conditions of the Creative Commons Attribution (CC BY) license (<http://creativecommons.org/licenses/by/4.0/>).

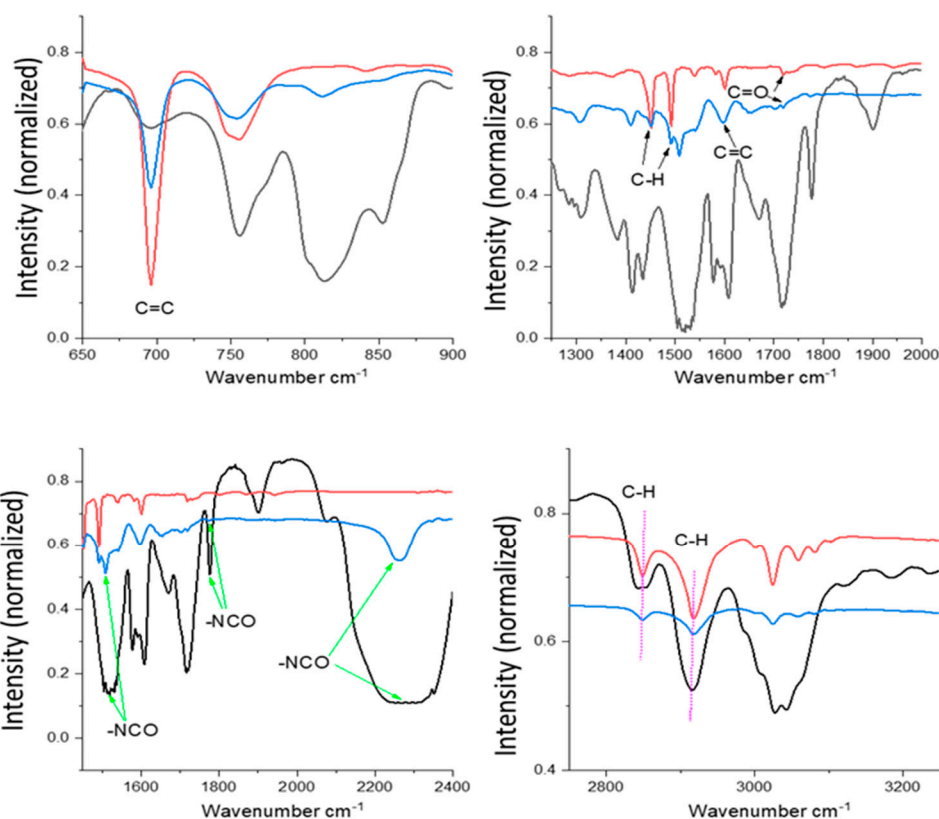

**Figure S1.** Detailed FTIR analysis of MDI, EPS and MDI coated EPS. Note: Colour codes are same for all graphs as per main text.

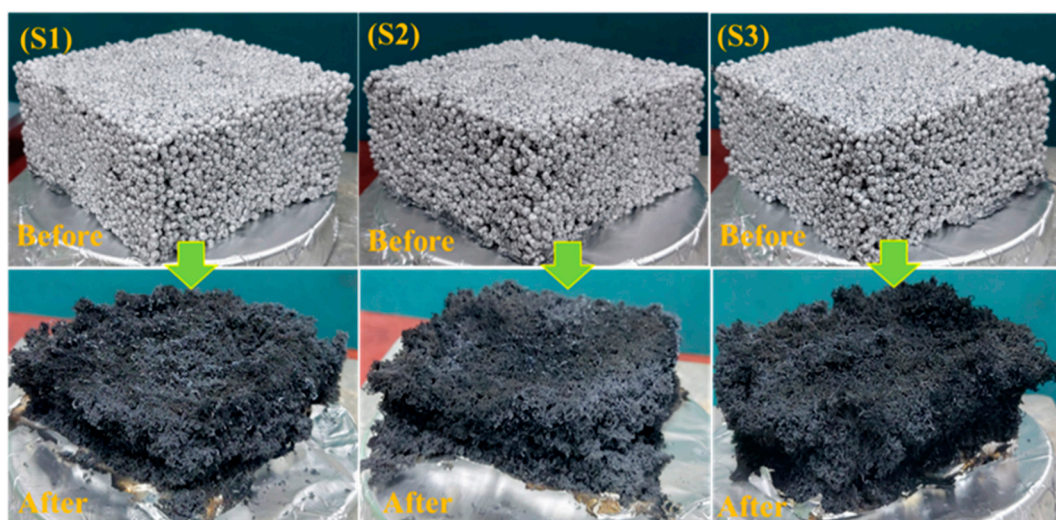

**Figure S2.** The digital photographs of the combustion phenomenon of (S1) EPS/IFR1 (S2) EPS/IFR2 and (S3) EPS/IFR3 (coating ratio 1:1.5).

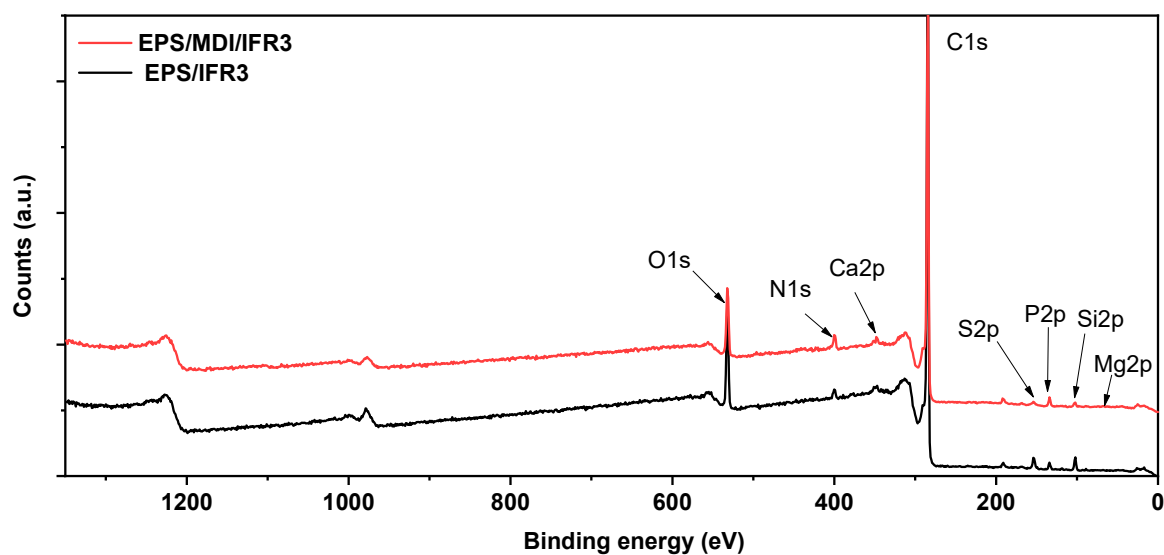

**Figure S3.** XPS survey spectra of char residues for EPS/IFR3 and EPS/MDI/IFR3 after cone calorimeter test.
